# Supplementary material for: In situ NbO x as an efficient interfacial layer on an SnO 2 electron-transport layer for high-performance and stable flexible perovskite solar cells
Source: Royal Society of Chemistry journal article supplement (doi:10.1039/d5se00323g), 2025-01-01
Supplement: d5se00323g1.pdf [file d5se00323g1.pdf]

**In situ NbO<sub>x</sub> as an Efficient Interfacial Layer on SnO<sub>2</sub> electron-transport layer for  
High-Performance and Stable Flexible Perovskite Solar Cells**

Jun Jiang <sup>a</sup>, Menghui Wang <sup>a</sup>, Gonglv Yang <sup>a</sup>, Hongwei Hu <sup>c</sup>, Pengyun Huo <sup>a</sup>, Lijun Wang <sup>a</sup>,  
Lvzhou Li <sup>b,\*</sup>, Ningyi Yuan <sup>a,\*\*</sup>, Jianning Ding <sup>b,\*\*\*</sup>

- a. School of Materials Science and Engineering, Jiangsu Collaborative Innovation Center of Photovoltaic Science and Engineering, Jiangsu Province Cultivation Base for State Key Laboratory of Photovoltaic Science and Technology, Changzhou University, Changzhou 213164, Jiangsu China.*
- b. Yangzhou Technological Innovation Institute for Carbon Neutralization, Yangzhou University, Yangzhou 225127, Jiangsu China.*
- c. School of Mechanical Engineering, Jiangsu University, Zhenjiang 212013, Jiangsu China.*

## **Materials.**

All the commercial materials were used as received without any future purification, including PbI<sub>2</sub> (99.99%, TCI), methylammonium Chloride (MACl, Xi'an Polymer Light Technology Corp.), HC(NH<sub>2</sub>)<sub>2</sub>I (FAI, Xi'an Polymer Light Technology Corp.), anhydrous DMF (99.9%, Alfa Aesar), dimethyl sulfoxide (DMSO, 99.9%, Sigma-Aldrich), chlorobenzene (CB, 99.9%, Alfa Aesar), bis(trifluoromethane)sulfonimide lithium salt (LiTFSI, Xi'an Polymer Light Technology Corp.), 2,2',7,7'-tetrakis-(N,N-di-4-methoxyphenylamino)-9,9'-spirobifluorene (spiro-OMeTAD, Xi'an Polymer Light Technology Corp.), ethanol niobium (99.9%, Alfa Aesar), SnO<sub>2</sub>(15% in H<sub>2</sub>O colloidal dispersion, Alfa Aesar), anhydrous ethyl alcohol (99.8%, Aladdin).

## **Experiment section.**

### **Preparation of the SnO<sub>2</sub> ETL**

Indium tin oxide (ITO) glass or ITO PET (polyethylene terephthalate) was cleaned with deionized water, acetone, and ethanol in turn. The ITO glass was dried and cleaned with UV ozone for 25 mins before use to increase surface passivation. The ITO substrate was then spin-coated with a dense layer of SnO<sub>2</sub> (2.67 %, diluted by deionized water) at 4000 rpm for 30 s before being annealed at 150 °C for 30 mins.

### **Preparation of the NbO<sub>x</sub> layer**

Ethanol-based niobium solution was prepared by dissolving ethanol niobium (0.45, 0.60, 0.75 mg) in 1 mL ethanol. The ethanol niobium solution was then spin-coated on the surface of SnO<sub>2</sub> substrate at 3000 rpm for 30 s, then annealed on a hot plate at 100 °C for 30 mins in a glove box, and finally, process with a UV Ozone cleaning machine for 1 hour.

### **Preparation of the perovskite film**

Metal-halide perovskite precursor solution was prepared by dissolving 1.53 M PbI<sub>2</sub>, 1.4 M FAI, 0.5 M MACl, and 0.0122 M MAPbBr<sub>3</sub> in 1 mL N, N-dimethyl formamide and dimethyl sulfoxide (8:1 v/v) mixed solvent. The dissolved perovskite precursor solution was spin-coated on the SnO<sub>2</sub> layer with 1,000 rpm for 10 s then 5,000 rpm for 30 s, and 100 µL of chlorobenzene was dropped on substrate 15~20 s before the spinning procedure was finished. And finally, the substrate was transferred to the hot plate for annealing at 100 °C for 60 mins.

### **Preparation of the Spiro-OMeTAD film and top electrode**

Spiro-OMeTAD solution was prepared by dissolving 101.9 mg of Spiro-OMeTAD in 1 mL chlorobenzene containing 24.36 µL Li-TFSI (520 mg Li-TSFI dissolved in 1 mL acetonitrile), 45.36 µL 4-tert-butylpyridine (4-tBP) and 49.6 µL Co-TFSI (300 mg Co-TSFI dissolved in 1 mL acetonitrile). And then, This Spiro-OMeTAD precursor solution 25 µL was spin-coated under the perovskite layer at 4,000 rpm for 30 s.

Finally, a ~80 nm metal (Ag/Au) film was deposited under the Spiro-OMeTAD layer by thermal evaporation.

## **Characterization.**

The *J-V* curves of PSCs were measured by a Keithley 2400 source meter under AM1.5G illumination with a solar simulator (San-ei Electric XES-301S) with a scan rate of 50 mV/s. The intensity of 1000 W/m<sup>2</sup> was calibrated by a standard silicon reference solar cell. The atomic force microscopic (AFM) images were performed by an atomic force microscope (Bruker, Dimension Icon). The SEM were obtained by a field-emission scanning electron microscopy (FESEM; Hitachi,

SU8020). The X-Ray Diffraction measurements were conducted by an X-ray diffractometer (Bruker, D8 Advance). The ultraviolet photoelectron spectra were obtained by a photoelectron spectrometer (PHI-5000 Versaprobe III) with a He-discharge lamp (He I,  $h\nu=21.22$  eV). Steady-state and time-resolved photoluminescence (PL) spectra were obtained by a photoluminescence spectrometer (Edinburgh, FLS 1000).

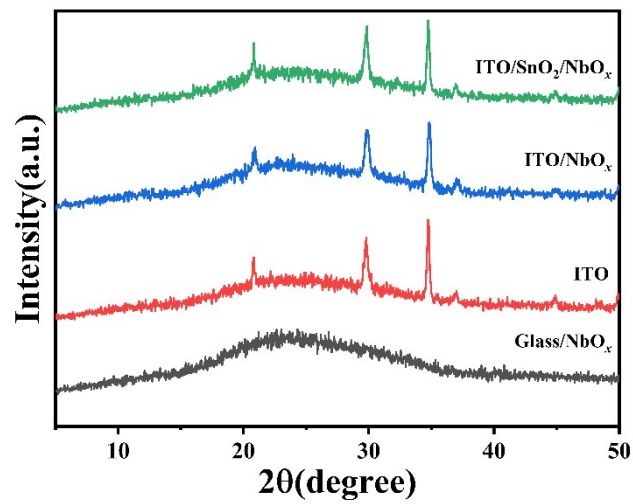

Fig. S1. X-ray diffraction patterns of NbO<sub>x</sub> films grown on glass, on ITO glass, and on SnO<sub>2</sub>.

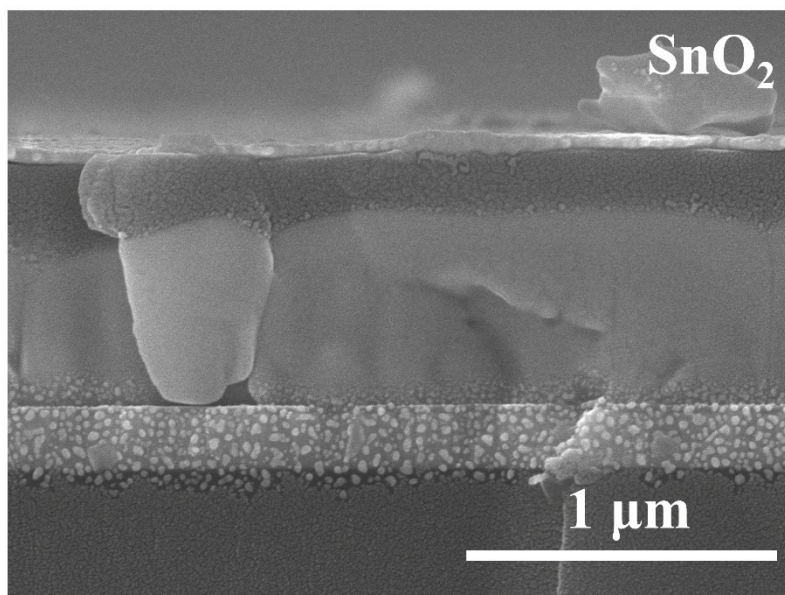

Fig. S2. Cross-sectional SEM image of PSCs based on SnO<sub>2</sub> film.

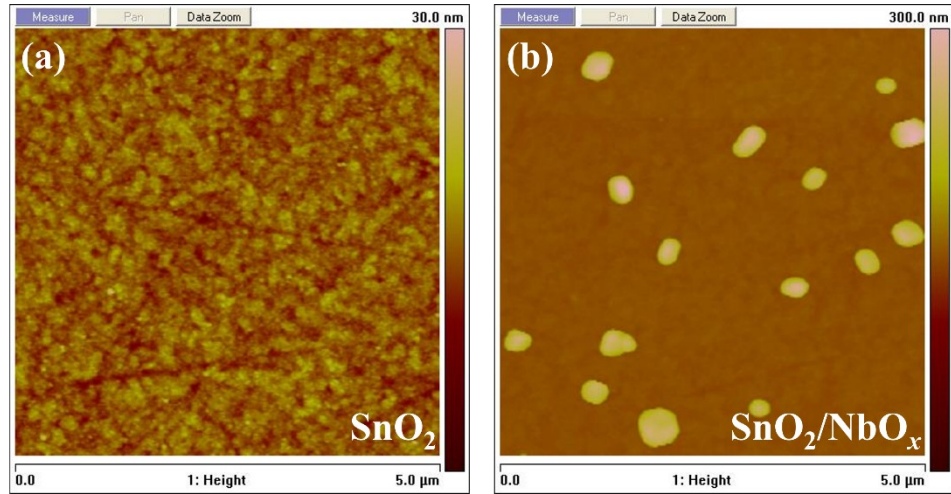

Fig. S3. AFM images of  $\text{SnO}_2$  and  $\text{SnO}_2/\text{NbO}_x$  films.

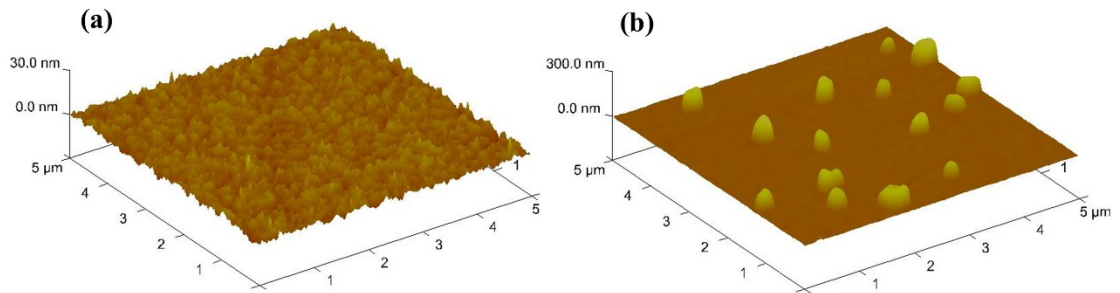

Fig. S4. 3D AFM image of the  $\text{SnO}_2$  and  $\text{SnO}_2/\text{NbO}_x$  film.

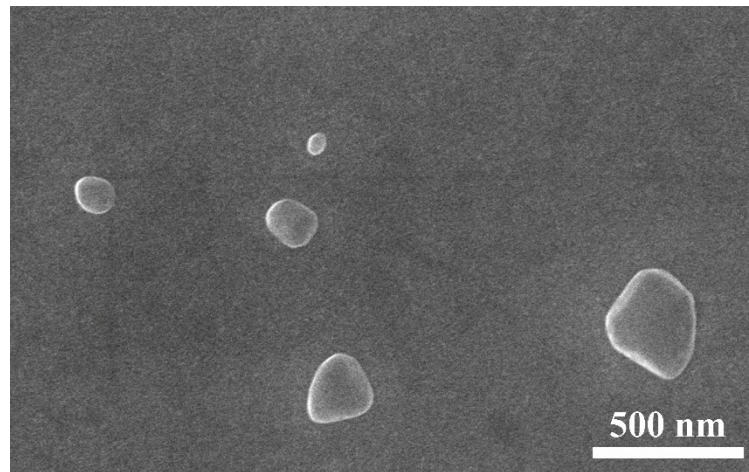

Fig. S5. Surface SEM image of the  $\text{SnO}_2/\text{NbO}_x$  film.

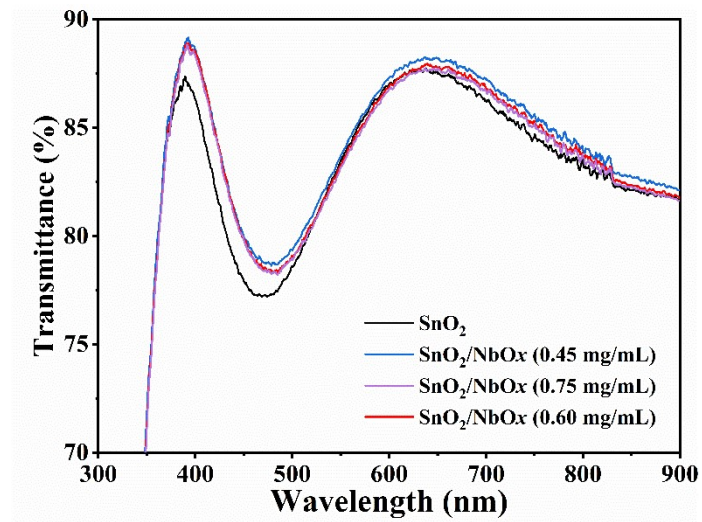

Fig. S6. Transmittance of the ITO substrates coated by SnO<sub>2</sub> and SnO<sub>2</sub>/NbO<sub>x</sub> films.

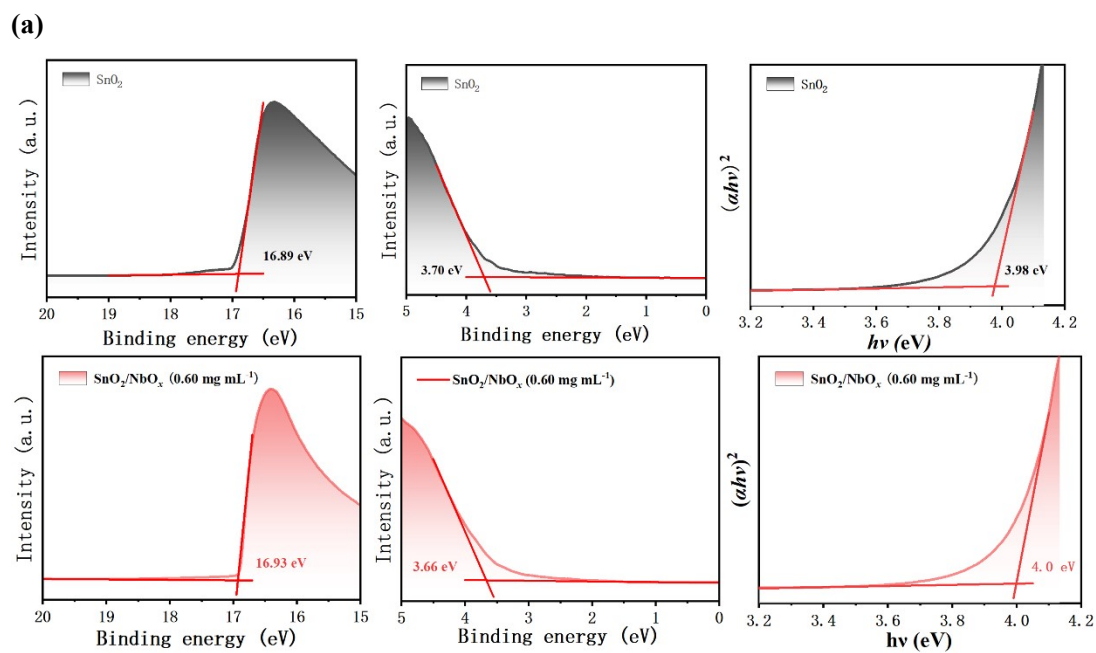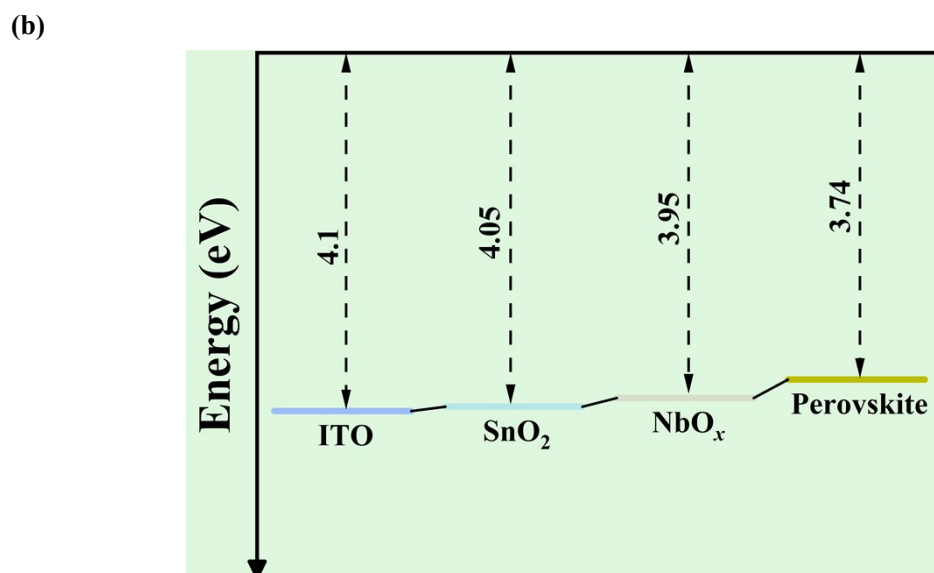

Fig. S7. (a) Valence band edges, cutoff regions and Tauc plots of for  $\text{SnO}_2$  and  $\text{SnO}_2/\text{NbO}_x$  films.  
(b) Schematic energy level alignment.

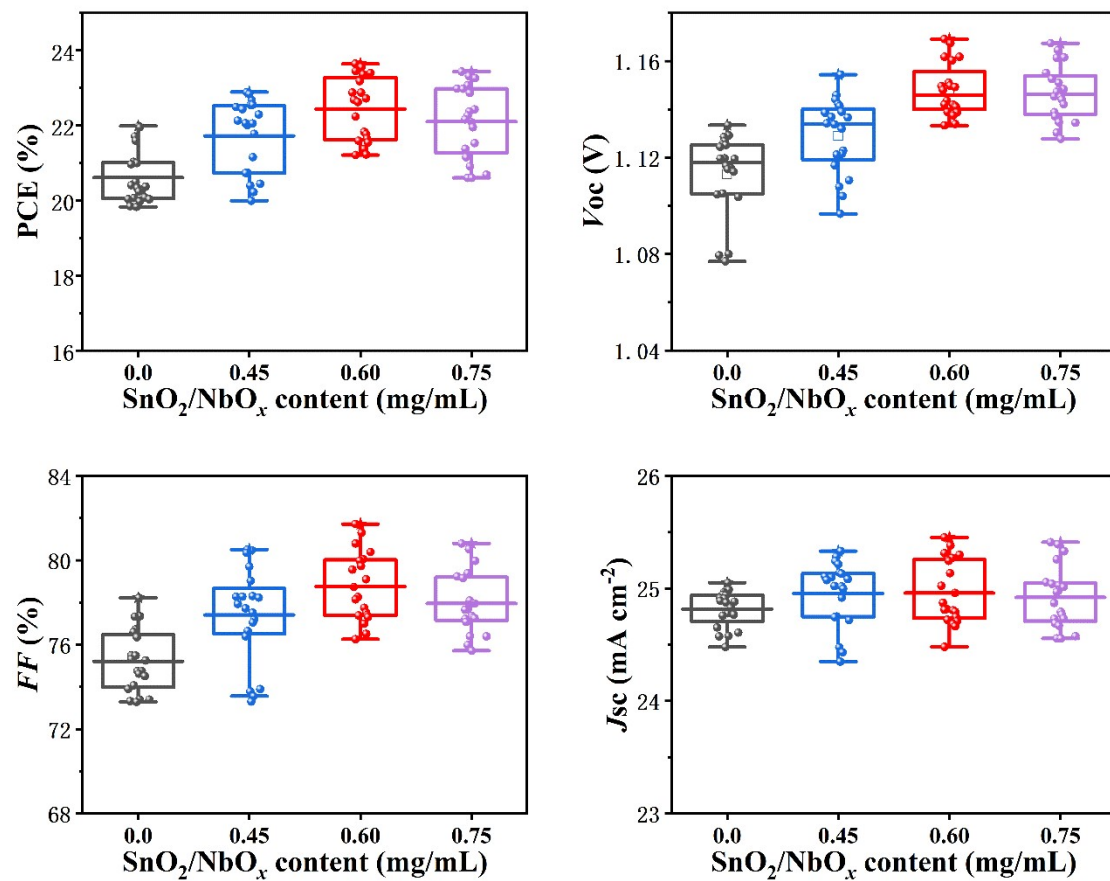

Fig. S8. Box charts of PCE,  $V_{oc}$ , FF,  $J_{sc}$  of PSCs with  $\text{SnO}_2$  and  $\text{SnO}_2/\text{NbO}_x$  at different Ethanol niobium(0.45 、0.60 、0.75 mg/L).



**Table S1. The full width at half maximum (FWHM) values of the corresponding XRD pattern of pristine and NbO<sub>x</sub>-based thin films.**

| sample     | FWHM of perovskite peaks |       |
|------------|--------------------------|-------|
|            | 14°                      | 28°   |
| 0 mg/mL    | 0.192                    | 0.174 |
| 0.45 mg/mL | 0.136                    | 0.146 |
| 0.60 mg/mL | 0.132                    | 0.141 |
| 0.75 mg/mL | 0.134                    | 0.144 |

**Table S2. The fitting parameters of the TRPL spectra for SnO<sub>2</sub>/perovskite and SnO<sub>2</sub>/NbO<sub>x</sub> perovskite films.**

|                                                 | $\tau_1$ | $A_1$ | $\tau_2$ | $A_2$ | $\tau_{ave}$ |
|-------------------------------------------------|----------|-------|----------|-------|--------------|
| SnO <sub>2</sub>                                | 58.90    | 0.21  | 264.41   | 0.87  | 253.92       |
| SnO <sub>2</sub> /NbO <sub>x</sub> (0.45 mg/ml) | 19.79    | 0.31  | 173.47   | 0.69  | 165.98       |
| SnO <sub>2</sub> /NbO <sub>x</sub> (0.6 mg/ml)  | 10.58    | 0.37  | 57.99    | 0.63  | 53.40        |
| SnO <sub>2</sub> /NbO <sub>x</sub> (0.75 mg/ml) | 16.72    | 0.31  | 106.58   | 0.69  | 100.66       |

**Table S3. Schematic energy level alignment.**

| Sample                                          | $E_f$ (eV) | $E_v$ (eV) | $E_c$ (eV) | $E_g$ (eV) |
|-------------------------------------------------|------------|------------|------------|------------|
| SnO <sub>2</sub>                                | 3.7        | -8.03      | -4.05      | 3.98       |
| SnO <sub>2</sub> /NbO <sub>x</sub> (0.60 mg/mL) | 3.66       | -7.95      | -3.95      | 4.0        |
| Perovskite                                      | 1.67       | -5.29      | -3.74      | 1.55       |

**Table S4. Photovoltaics parameters of perovskite solar cells with different concentrations (mg/mL) of ethanol niobium treating SnO<sub>2</sub> film measured under standard 1-sun illumination (reverse and forward scan).**

|                                                 | Scan direction | $V_{oc}$ (V) | PCE (%) | $FF$ (%) | $J_{sc}$ (mA/cm <sup>2</sup> ) |
|-------------------------------------------------|----------------|--------------|---------|----------|--------------------------------|
| SnO <sub>2</sub>                                | Reverse        | 1.13         | 22.08   | 79.97    | 24.52                          |
|                                                 | Forward        | 1.10         | 19.18   | 70.90    | 24.56                          |
| SnO <sub>2</sub> /NbO <sub>x</sub> (0.45 mg/mL) | Reverse        | 1.15         | 22.87   | 80.38    | 24.72                          |
|                                                 | Forward        | 1.12         | 19.89   | 71.87    | 24.76                          |
| SnO <sub>2</sub> /NbO <sub>x</sub> (0.60 mg/mL) | Reverse        | 1.17         | 23.64   | 81.31    | 24.87                          |
|                                                 | Forward        | 1.15         | 20.50   | 71.58    | 24.89                          |
| SnO <sub>2</sub> /NbO <sub>x</sub> (0.75 mg/mL) | Reverse        | 1.17         | 23.26   | 80.79    | 24.66                          |
|                                                 | Forward        | 1.13         | 19.56   | 70.06    | 24.67                          |

**Table S5. Photovoltaics parameters of flexible perovskite solar cells.**

|                                    | $V_{oc}(V)$ | PCE (%) | $FF$ (%) | $J_{sc}$ (mA/cm <sup>2</sup> ) |
|------------------------------------|-------------|---------|----------|--------------------------------|
| SnO <sub>2</sub>                   | 1.02        | 19.54   | 78.75    | 24.28                          |
| SnO <sub>2</sub> /NbO <sub>x</sub> | 1.10        | 21.86   | 81.54    | 24.46                          |
